# Supplementary material for: Fishing for Targets of Alien Metabolites: A Novel Peroxisome Proliferator-Activated Receptor (PPAR) Agonist from a Marine Pest
Source: MDPI journal article supplement (doi:10.3390/md16110431), 2018-11-03

## Supplementary Information

Figure S1.  $^1\text{H}$  NMR Spectrum of CAU (DMSO- $d_6$ ).

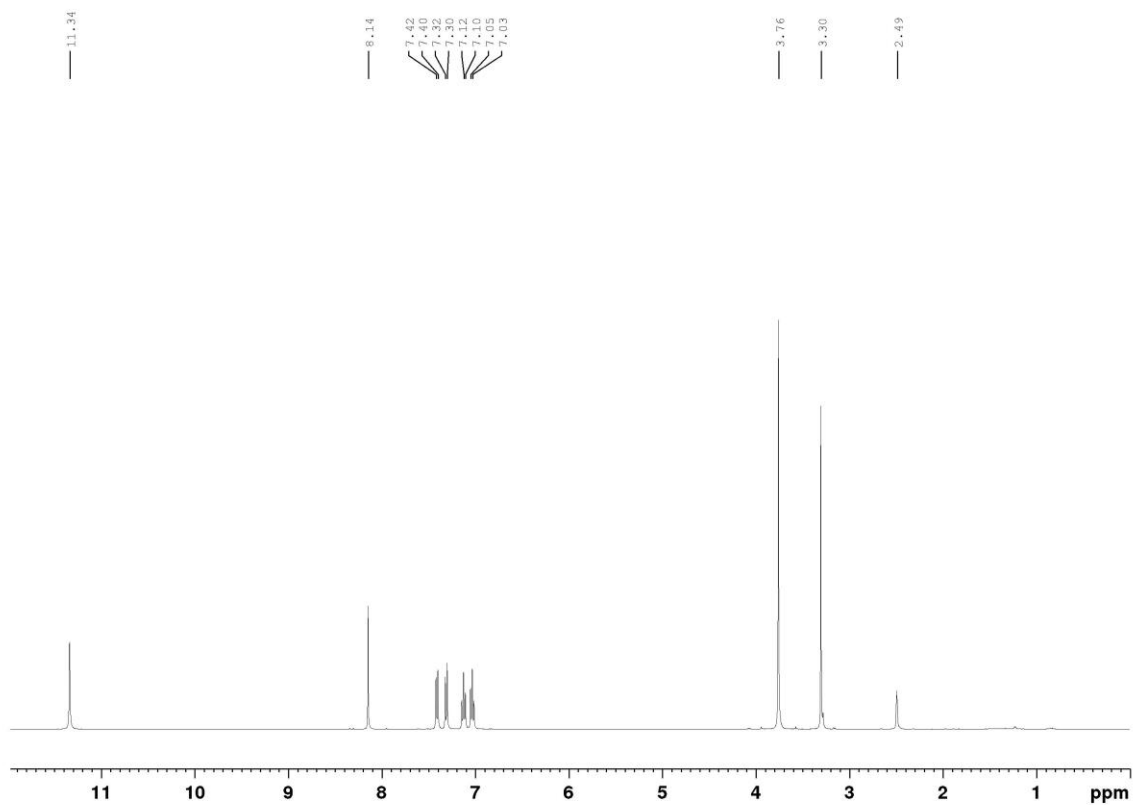

Figure S2.  $^{13}\text{C}$  NMR Spectrum of CAU ( $\text{DMSO-d}_6$ ).

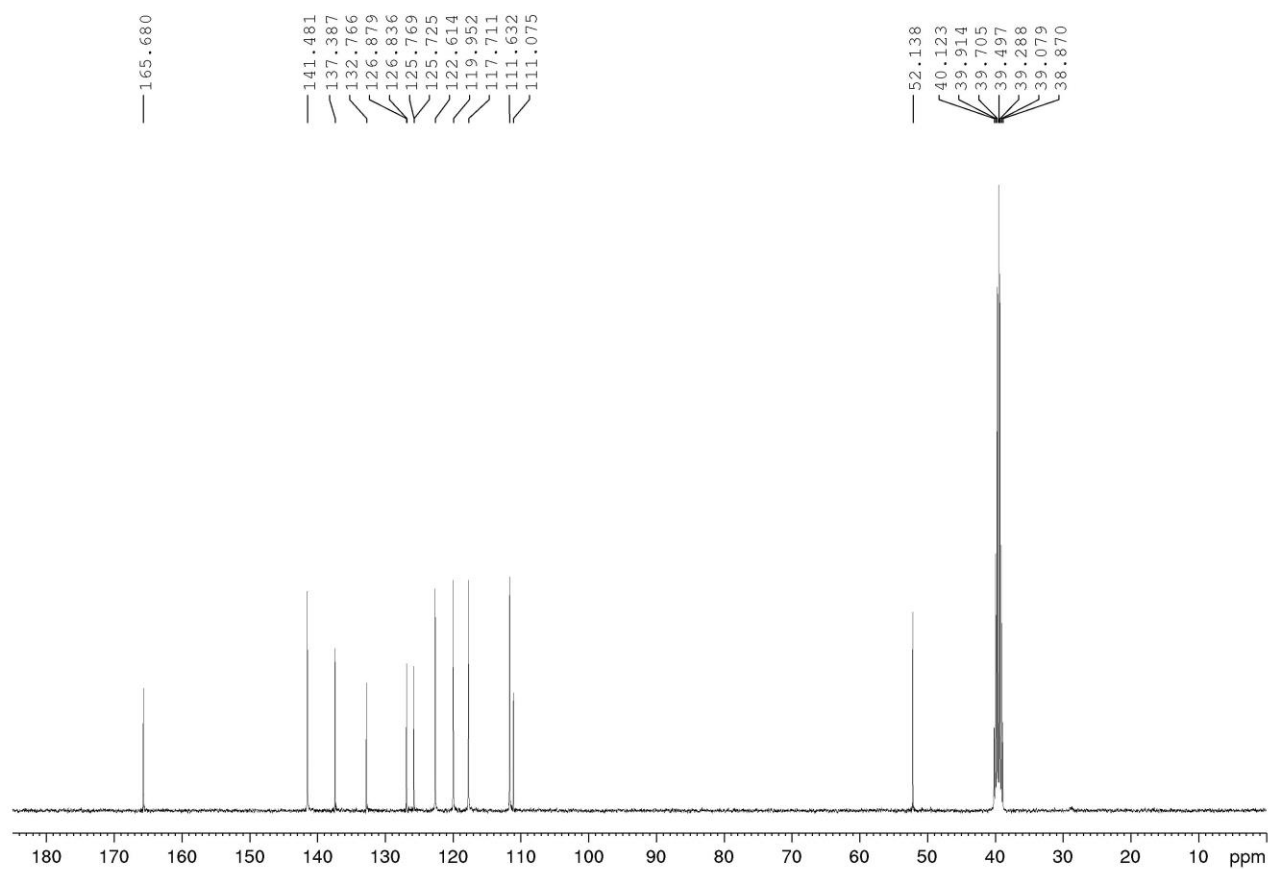

Supplement: s1 [file s1]
